# Supplementary material for: Which strategies might improve local primary healthcare in Germany? An explorative study from a local government point of view
Source: Springer Nature journal article supplement (doi:10.1186/s12875-017-0696-z), 2017-12-01

Institute for Epidemiology, Social Medicine and Health Systems Research  
MHH – Hannover Medical School

## Survey of Mayors in Lower Saxony on the Municipal Impact of Outpatient Physician Supply

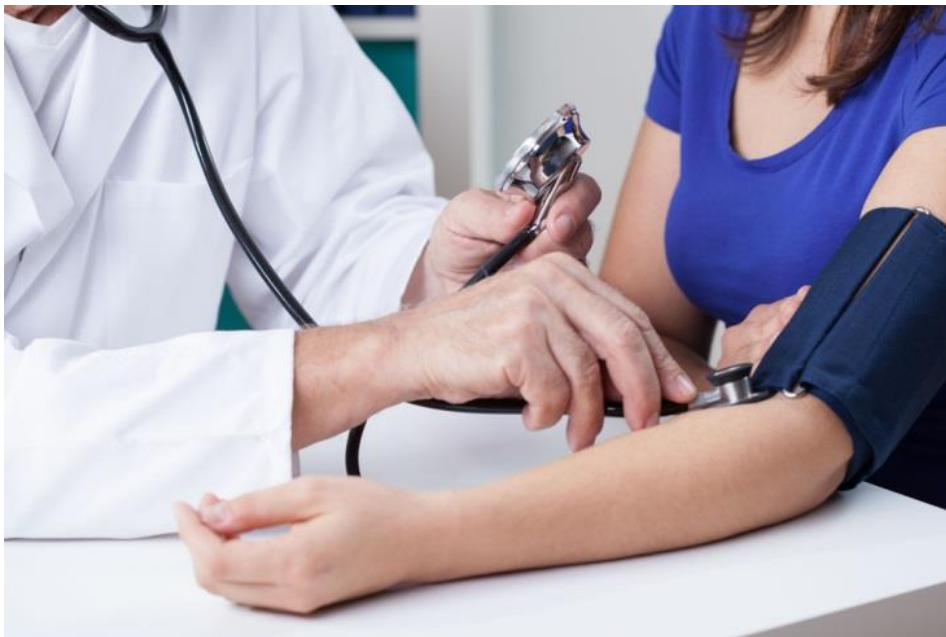

### Project Managers:

Professor Dr. Volker E. Amelung

Professor Dr. Christian Krauth

Medizinische Hochschule Hannover (Hannover Medical School)

Institute of Epidemiology, Social Medicine and Health Systems Research

Carl-Neuberg-Str. 1

30625 Hannover, Germany

### Cooperation Partners:

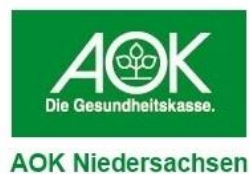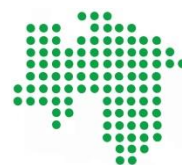

**KVN**

Kassenärztliche Vereinigung  
Niedersachsen

## Instructions for Completing the Questionnaire

Insert an "X" to clearly mark the box or circle indicating your response.

Boxes indicate that only ONE response can be selected.

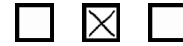

Circles mean that multiple responses can be selected.

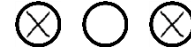

To correct a response, completely blot out the incorrect field as follows:

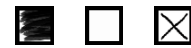

Rectangles are completed by writing in a number:

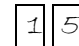

Some questions require you to make free text responses, which should be written in block letters:

Doctors

In this questionnaire, the word "municipality" basically refers to the city, municipality or "*Einheitsgemeinde*" (greater municipality) that you represent as mayor. For better readability, some sentences in this questionnaire may use male pronoun forms only, but expressly refer to both males and females.

This questionnaire takes approximately 15 minutes to complete.

If you have any questions, please contact Mr. Bertolt Kuhn by phone or email: ☎ + (0)511 532 6826;  
✉ Kuhn.Bertolt@mh-hannover.de.

THANKS FOR YOUR ASSISTANCE!

Prof. Dr. Volker E. Amelung

Prof. Dr. Christian Krauth

Bertolt Kuhn

## A. Assessment of Outpatient Physician Supply

Healthcare policy-makers are increasingly concerned about differences in the supply of municipalities with general practitioners and medical specialists. Some regions have a very good supply of doctors, while others report a current or upcoming shortage of physicians.

1. As a mayor, how satisfied or dissatisfied are you, overall, with the outpatient care available in your municipality?

|                          |                          |                          |                          |                          |
|--------------------------|--------------------------|--------------------------|--------------------------|--------------------------|
| Dissatisfied             | Somewhat dissatisfied    | Neither*                 | Somewhat satisfied       | Satisfied                |
| <input type="checkbox"/> | <input type="checkbox"/> | <input type="checkbox"/> | <input type="checkbox"/> | <input type="checkbox"/> |

2. Does your municipality have (at least) ...

|                                                          | Yes                      | No                       |
|----------------------------------------------------------|--------------------------|--------------------------|
| ... one general practitioner?                            | <input type="checkbox"/> | <input type="checkbox"/> |
| ... one specialist physician?? (besides a dentist)       | <input type="checkbox"/> | <input type="checkbox"/> |
| ... one social services office?                          | <input type="checkbox"/> | <input type="checkbox"/> |
| ... one medical supply store?                            | <input type="checkbox"/> | <input type="checkbox"/> |
| ... one hospital?                                        | <input type="checkbox"/> | <input type="checkbox"/> |
| ... one outpatient or inpatient rehabilitation facility? | <input type="checkbox"/> | <input type="checkbox"/> |
| ... one inpatient nursing facility?                      | <input type="checkbox"/> | <input type="checkbox"/> |

3. Please rate the following statements:

|                                                                            | Completely disagree      | Partly disagree          | Partly agree             | Completely agree         |
|----------------------------------------------------------------------------|--------------------------|--------------------------|--------------------------|--------------------------|
| Overall, there are enough <u>general practitioners</u> in my municipality. | <input type="checkbox"/> | <input type="checkbox"/> | <input type="checkbox"/> | <input type="checkbox"/> |
| Overall, there are enough <u>medical specialists</u> in my municipality.   | <input type="checkbox"/> | <input type="checkbox"/> | <input type="checkbox"/> | <input type="checkbox"/> |
| Which specialties are absent or under-represented?                         | ↓                        | ↓                        | _____                    |                          |
|                                                                            | _____                    |                          |                          |                          |

4. Filling vacancies in medical practices is currently a problem in my municipality or will be in the near future.

Completely  
disagree

Partly  
disagree

Partly  
agree  
  
↓

Completely  
agree  
  
↓

If filling vacancies is (or might be) a problem in your municipality: **What are the reasons for this, in your opinion?**  
*(Multiple responses are possible.)*

- General shortage of physicians
- Lack of local infrastructure facilities (e.g., educational or cultural offerings)
- Disadvantageous geographical location of the municipality
- Unattractive earning potentials
- High physician workload
- Lack of job offers for spouses or life partners of physicians
- Other  
(please specify): \_\_\_\_\_

Completely  
disagree

Partly  
disagree

Partly agree  
and disagree

Partly  
agree

Completely  
agree

5. Residents in my municipality can easily reach the independent physicians by public transportation.

6. What are currently the greatest challenges to outpatient medical care in your municipality? *(Multiple responses are possible.)*

- Reaching care-dependent patients
- Accessibility of doctor's offices
- Emergency care
- Providing care on weekends
- Filling vacancies in doctor's offices
- Access to specialist physicians in the vicinity
- Other  
(please specify): \_\_\_\_\_

## B. Options for exerting municipal influence on the outpatient physician supply

In the following section, we would like to learn how you perceive generalist and specialist care as a municipal topic. What is your personal opinion?

7. How great a role does outpatient physician supply play as a location attractiveness factor for your municipality, in your opinion?

|                          |                          |                          |                          |                          |
|--------------------------|--------------------------|--------------------------|--------------------------|--------------------------|
| Very small               | Small                    | Moderate                 | Large                    | Very large               |
| <input type="checkbox"/> | <input type="checkbox"/> | <input type="checkbox"/> | <input type="checkbox"/> | <input type="checkbox"/> |

8. Please rate the following statements:

|                                                                                                                                                                                                        | Completely disagree      | Partly disagree          | Partly agree and disagree | Partly agree             | Completely agree         |
|--------------------------------------------------------------------------------------------------------------------------------------------------------------------------------------------------------|--------------------------|--------------------------|---------------------------|--------------------------|--------------------------|
| Outpatient physician supply is a fundamental public service topic in my municipality.                                                                                                                  | <input type="checkbox"/> | <input type="checkbox"/> | <input type="checkbox"/>  | <input type="checkbox"/> | <input type="checkbox"/> |
| Ensuring the outpatient physician supply is the responsibility of the Association of Statutory Health Insurance Physicians. However, mayors should still attend to this issue in their municipalities. | <input type="checkbox"/> | <input type="checkbox"/> | <input type="checkbox"/>  | <input type="checkbox"/> | <input type="checkbox"/> |
| Every greater municipality (“Einheitsgemeinde”) should have at least one local general practitioner, regardless of its population size.                                                                | <input type="checkbox"/> | <input type="checkbox"/> | <input type="checkbox"/>  | <input type="checkbox"/> | <input type="checkbox"/> |
| General practitioners should live in the municipality in which they practice medicine.                                                                                                                 | <input type="checkbox"/> | <input type="checkbox"/> | <input type="checkbox"/>  | <input type="checkbox"/> | <input type="checkbox"/> |

9. What is the maximum acceptable time a resident in your municipality should have to travel from home to the doctor’s office, in your opinion? (if not an emergency)

*Please write in the maximum acceptable travel time in minutes.*

|                    |        |                                                                                                                                                                                                                   |  |  |  |  |  |  |  |  |  |     |  |                     |                                                                                                                                                                                                                   |  |  |  |  |  |  |  |  |  |     |
|--------------------|--------|-------------------------------------------------------------------------------------------------------------------------------------------------------------------------------------------------------------------|--|--|--|--|--|--|--|--|--|-----|--|---------------------|-------------------------------------------------------------------------------------------------------------------------------------------------------------------------------------------------------------------|--|--|--|--|--|--|--|--|--|-----|
| To the <u>GP</u> : | By car | <table border="1" style="border-collapse: collapse; width: 30px; height: 20px;"> <tr><td> </td><td> </td><td> </td></tr> <tr><td> </td><td> </td><td> </td></tr> <tr><td> </td><td> </td><td> </td></tr> </table> |  |  |  |  |  |  |  |  |  | Min |  | By public transport | <table border="1" style="border-collapse: collapse; width: 30px; height: 20px;"> <tr><td> </td><td> </td><td> </td></tr> <tr><td> </td><td> </td><td> </td></tr> <tr><td> </td><td> </td><td> </td></tr> </table> |  |  |  |  |  |  |  |  |  | Min |
|                    |        |                                                                                                                                                                                                                   |  |  |  |  |  |  |  |  |  |     |  |                     |                                                                                                                                                                                                                   |  |  |  |  |  |  |  |  |  |     |
|                    |        |                                                                                                                                                                                                                   |  |  |  |  |  |  |  |  |  |     |  |                     |                                                                                                                                                                                                                   |  |  |  |  |  |  |  |  |  |     |
|                    |        |                                                                                                                                                                                                                   |  |  |  |  |  |  |  |  |  |     |  |                     |                                                                                                                                                                                                                   |  |  |  |  |  |  |  |  |  |     |
|                    |        |                                                                                                                                                                                                                   |  |  |  |  |  |  |  |  |  |     |  |                     |                                                                                                                                                                                                                   |  |  |  |  |  |  |  |  |  |     |
|                    |        |                                                                                                                                                                                                                   |  |  |  |  |  |  |  |  |  |     |  |                     |                                                                                                                                                                                                                   |  |  |  |  |  |  |  |  |  |     |
|                    |        |                                                                                                                                                                                                                   |  |  |  |  |  |  |  |  |  |     |  |                     |                                                                                                                                                                                                                   |  |  |  |  |  |  |  |  |  |     |
| To a specialist:   | By car | <table border="1" style="border-collapse: collapse; width: 30px; height: 20px;"> <tr><td> </td><td> </td><td> </td></tr> <tr><td> </td><td> </td><td> </td></tr> <tr><td> </td><td> </td><td> </td></tr> </table> |  |  |  |  |  |  |  |  |  | Min |  | By public transport | <table border="1" style="border-collapse: collapse; width: 30px; height: 20px;"> <tr><td> </td><td> </td><td> </td></tr> <tr><td> </td><td> </td><td> </td></tr> <tr><td> </td><td> </td><td> </td></tr> </table> |  |  |  |  |  |  |  |  |  | Min |
|                    |        |                                                                                                                                                                                                                   |  |  |  |  |  |  |  |  |  |     |  |                     |                                                                                                                                                                                                                   |  |  |  |  |  |  |  |  |  |     |
|                    |        |                                                                                                                                                                                                                   |  |  |  |  |  |  |  |  |  |     |  |                     |                                                                                                                                                                                                                   |  |  |  |  |  |  |  |  |  |     |
|                    |        |                                                                                                                                                                                                                   |  |  |  |  |  |  |  |  |  |     |  |                     |                                                                                                                                                                                                                   |  |  |  |  |  |  |  |  |  |     |
|                    |        |                                                                                                                                                                                                                   |  |  |  |  |  |  |  |  |  |     |  |                     |                                                                                                                                                                                                                   |  |  |  |  |  |  |  |  |  |     |
|                    |        |                                                                                                                                                                                                                   |  |  |  |  |  |  |  |  |  |     |  |                     |                                                                                                                                                                                                                   |  |  |  |  |  |  |  |  |  |     |
|                    |        |                                                                                                                                                                                                                   |  |  |  |  |  |  |  |  |  |     |  |                     |                                                                                                                                                                                                                   |  |  |  |  |  |  |  |  |  |     |
| To the hospital:   | By car | <table border="1" style="border-collapse: collapse; width: 30px; height: 20px;"> <tr><td> </td><td> </td><td> </td></tr> <tr><td> </td><td> </td><td> </td></tr> <tr><td> </td><td> </td><td> </td></tr> </table> |  |  |  |  |  |  |  |  |  | Min |  | By public transport | <table border="1" style="border-collapse: collapse; width: 30px; height: 20px;"> <tr><td> </td><td> </td><td> </td></tr> <tr><td> </td><td> </td><td> </td></tr> <tr><td> </td><td> </td><td> </td></tr> </table> |  |  |  |  |  |  |  |  |  | Min |
|                    |        |                                                                                                                                                                                                                   |  |  |  |  |  |  |  |  |  |     |  |                     |                                                                                                                                                                                                                   |  |  |  |  |  |  |  |  |  |     |
|                    |        |                                                                                                                                                                                                                   |  |  |  |  |  |  |  |  |  |     |  |                     |                                                                                                                                                                                                                   |  |  |  |  |  |  |  |  |  |     |
|                    |        |                                                                                                                                                                                                                   |  |  |  |  |  |  |  |  |  |     |  |                     |                                                                                                                                                                                                                   |  |  |  |  |  |  |  |  |  |     |
|                    |        |                                                                                                                                                                                                                   |  |  |  |  |  |  |  |  |  |     |  |                     |                                                                                                                                                                                                                   |  |  |  |  |  |  |  |  |  |     |
|                    |        |                                                                                                                                                                                                                   |  |  |  |  |  |  |  |  |  |     |  |                     |                                                                                                                                                                                                                   |  |  |  |  |  |  |  |  |  |     |
|                    |        |                                                                                                                                                                                                                   |  |  |  |  |  |  |  |  |  |     |  |                     |                                                                                                                                                                                                                   |  |  |  |  |  |  |  |  |  |     |

10. Stakeholders at which level should be more involved in securing the outpatient physician supply in the future?  
(Multiple responses are possible.)

Federal / state

Municipal

Associations of Statutory Health Insurance Physicians

Health insurance companies

College and university

Other

(please specify):

\_\_\_\_\_

No additional involvement is needed to secure the physician supply.

11. As a mayor, how great are your possibilities to exert influence on ensuring the local outpatient physician?

Very small

Small

Moderate

Large

Very large

12. Do you see a need for supplementary municipal measures to encourage physicians to settle in your municipality?

Yes

No

13. Which supplementary municipal measures do you think are important for encouraging physicians to settle in your municipality? (Multiple responses are possible.)

Creating an attractive infrastructure

Easing personal framework conditions for doctors  
(e.g., compatibility of work and family life).

Increased cooperation with the Association of Statutory Health Insurance Physicians

Providing financial support

Other

(please specify):

\_\_\_\_\_

No supplementary municipal measures are important / necessary for encouraging physicians to settle in my municipality.

14. Do you see any obstacles to the implementation of municipal measures to encourage physicians to settle in your municipality?

Yes (please specify): *(Multiple responses are possible.)*  No *Skip to Question 15*

Lack of jurisdiction/authority or ability to intervene

Lack of financial resources

Lack of personnel

Lack of knowledge

Restrictions imposed by municipal law or competition law

Other obstacles

(please specify): \_\_\_\_\_

15. Please rate the feasibility of implementation of the following municipal measures for encouraging physicians to settle in your municipality.

|                                                                                             | Completely<br>unfeasible | Unfeasible               | Partly<br>feasible       | Feasible                 | Completely<br>feasible   |
|---------------------------------------------------------------------------------------------|--------------------------|--------------------------|--------------------------|--------------------------|--------------------------|
| Supplementary assistance for establishing a medical practice (e.g., renovation assistance)  | <input type="checkbox"/> | <input type="checkbox"/> | <input type="checkbox"/> | <input type="checkbox"/> | <input type="checkbox"/> |
| Loan acquisition support                                                                    | <input type="checkbox"/> | <input type="checkbox"/> | <input type="checkbox"/> | <input type="checkbox"/> | <input type="checkbox"/> |
| Provision of cheap properties                                                               | <input type="checkbox"/> | <input type="checkbox"/> | <input type="checkbox"/> | <input type="checkbox"/> | <input type="checkbox"/> |
| Provision of low-rent or rent-free medical premises                                         | <input type="checkbox"/> | <input type="checkbox"/> | <input type="checkbox"/> | <input type="checkbox"/> | <input type="checkbox"/> |
| Assistance to help doctors acquire funds from support programs                              | <input type="checkbox"/> | <input type="checkbox"/> | <input type="checkbox"/> | <input type="checkbox"/> | <input type="checkbox"/> |
| Creation of an information platform with lists of contacts for doctors and medical students | <input type="checkbox"/> | <input type="checkbox"/> | <input type="checkbox"/> | <input type="checkbox"/> | <input type="checkbox"/> |
| Financial aid for medical students (e.g., scholarships)                                     | <input type="checkbox"/> | <input type="checkbox"/> | <input type="checkbox"/> | <input type="checkbox"/> | <input type="checkbox"/> |
| Job search assistance for physician's spouses or partners                                   | <input type="checkbox"/> | <input type="checkbox"/> | <input type="checkbox"/> | <input type="checkbox"/> | <input type="checkbox"/> |
| Child care assistance                                                                       | <input type="checkbox"/> | <input type="checkbox"/> | <input type="checkbox"/> | <input type="checkbox"/> | <input type="checkbox"/> |

16. Which other municipal measures for encouraging physicians to settle in your municipality do you think are feasible?

---

---

17. Have municipal measures already been implemented to encourage physicians to settle in your municipality? If so, which measures?

---

---

18. Would you like to have greater involvement of your municipality in securing the physician supply to your area in the future? This refers to more opportunities for cooperation or for exerting independent municipal influence, etc.

|                          |                          |                          |                          |                          |
|--------------------------|--------------------------|--------------------------|--------------------------|--------------------------|
| Strongly disagree        | Disagree                 | Agree                    | Strongly agree           | Undecided                |
| <input type="checkbox"/> | <input type="checkbox"/> | <input type="checkbox"/> | <input type="checkbox"/> | <input type="checkbox"/> |

19. Doctors in the outpatient sector work as either independent physicians in private practice or as employees of a health care center (HCC), together with doctors of various specialties. In the future, it should be easier for municipalities to establish health care centers as municipal enterprises that employ physicians and equally participate in providing outpatient care.

Is establishing health care centers as municipal enterprises fundamentally suitable for your municipality?

|                          |                          |                          |                          |                          |
|--------------------------|--------------------------|--------------------------|--------------------------|--------------------------|
| Strongly disagree        | Disagree                 | Agree                    | Strongly agree           | Undecided                |
| <input type="checkbox"/> | <input type="checkbox"/> | <input type="checkbox"/> | <input type="checkbox"/> | <input type="checkbox"/> |

Briefly explain your response (using keywords):



## C. Suitability of new health care models

Besides providing support and assistance for medical practices, various new care models are being discussed as additional ways to secure the physician supply. Some of these models are already being implemented, while others are still being treated as “visions for the future” in Germany”. The degree of suitability of such care models for a given municipality varies according to the local circumstances.

20. Please rate the suitability of the following four health care models for your municipality.

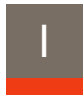

### Trained medical assistants

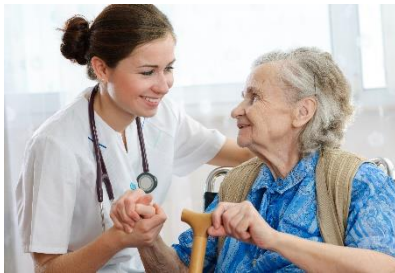

Medical assistants can undergo additional training qualifying them to relieve doctors of certain duties. Routine medical duties, such as wound treatment, home check-up visits, and medical documentation, can then be performed by the Trained Medical Assistant (TMA). However, the doctor is still the responsible party. TMAs can relieve doctors of certain duties, giving physicians more time to treat patients in their office.

How suitable is this health care model for your municipality?

Very unsuitable

Unsuitable

Partly suitable and  
unsuitable

Suitable

Very suitable

Briefly explain your response (using keywords):

**2****Patient bus**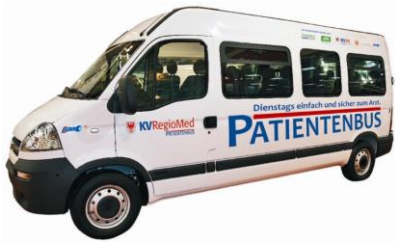

Patient buses are a means of transportation designed to ensure patient access to the doctor's offices by public transport. Patient buses take patients from remote areas of the municipality to the doctor's office and back. The operating hours of the patient buses are aligned with those of the doctor's offices.

**How suitable is this health care model for your municipality?**

Very unsuitable

Unsuitable

Partly suitable and  
unsuitable

Suitable

Very suitable

Briefly explain your response (using keywords):

**3****Mobile physicians' office**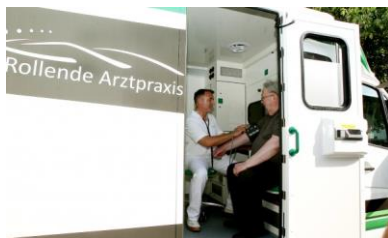

The mobile physicians' office is a fully-equipped doctor's office integrated in a converted camper van or minibus. The doctor can drive the mobile medical practice to remote areas where there is no local general practitioner. A mobile physicians' office is equipped like a normal primary care practice and provides a first point of contact for medical care.

**How suitable is this health care model for your municipality?**

Very unsuitable

Unsuitable

Partly suitable and  
unsuitable

Suitable

Very suitable

Briefly explain your response (using keywords):

**4****Remote treatment (telemedicine)**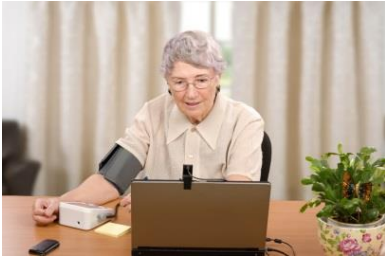

In telemedicine, patients do not present in the doctor's office physically, but receive remote treatment and advice from a physician via telecommunication and information technology. This saves patients from having to travel long distances. Contact between telemedicine patients and doctors takes place via email, telephone and/or videoconferencing. Based on the reported symptoms of disease, the doctor decides whether to issue the patient a drug prescription or sick leave. If an examination that cannot be performed remotely is needed, the patient must schedule an appointment and present to the doctor in person.

**How suitable is this health care model for your municipality?**

Very unsuitable

Unsuitable

Partly suitable and  
unsuitable

Suitable

Very suitable

Briefly explain your response (using keywords):

## D. Municipal structure and sociodemographics

In this last section, we ask you to provide brief information about your municipality:

21. What type of municipality do you represent?

- Independent city       Large independent city  
 Independent municipality       Other county-based municipality

22. Are you mayor of a joint municipality?

- Yes       No

23. What is the population size of your municipality?

- ≤ 5,000       5,001 to 10,000       10,001 to 20,000  
 20,001 to 50,000       > 50,000

24. In which regional environment is your municipality located?

- Urban area or urban agglomeration  
 Rural area

25. In which year did you become mayor of your municipality? \*

In (year):

26. What is your age? \*

years

27. What is your gender? \*

- Male       Female

\* The information is voluntary.

**Do you have any questions or comments to the questionnaire?**

---

---

---

---

---

---

---

---

**THANKS FOR YOUR ASSISTANCE!**

**Please return the completed questionnaire by 15 September 2015.  
Please use the postage-paid return envelope provided for that purpose**

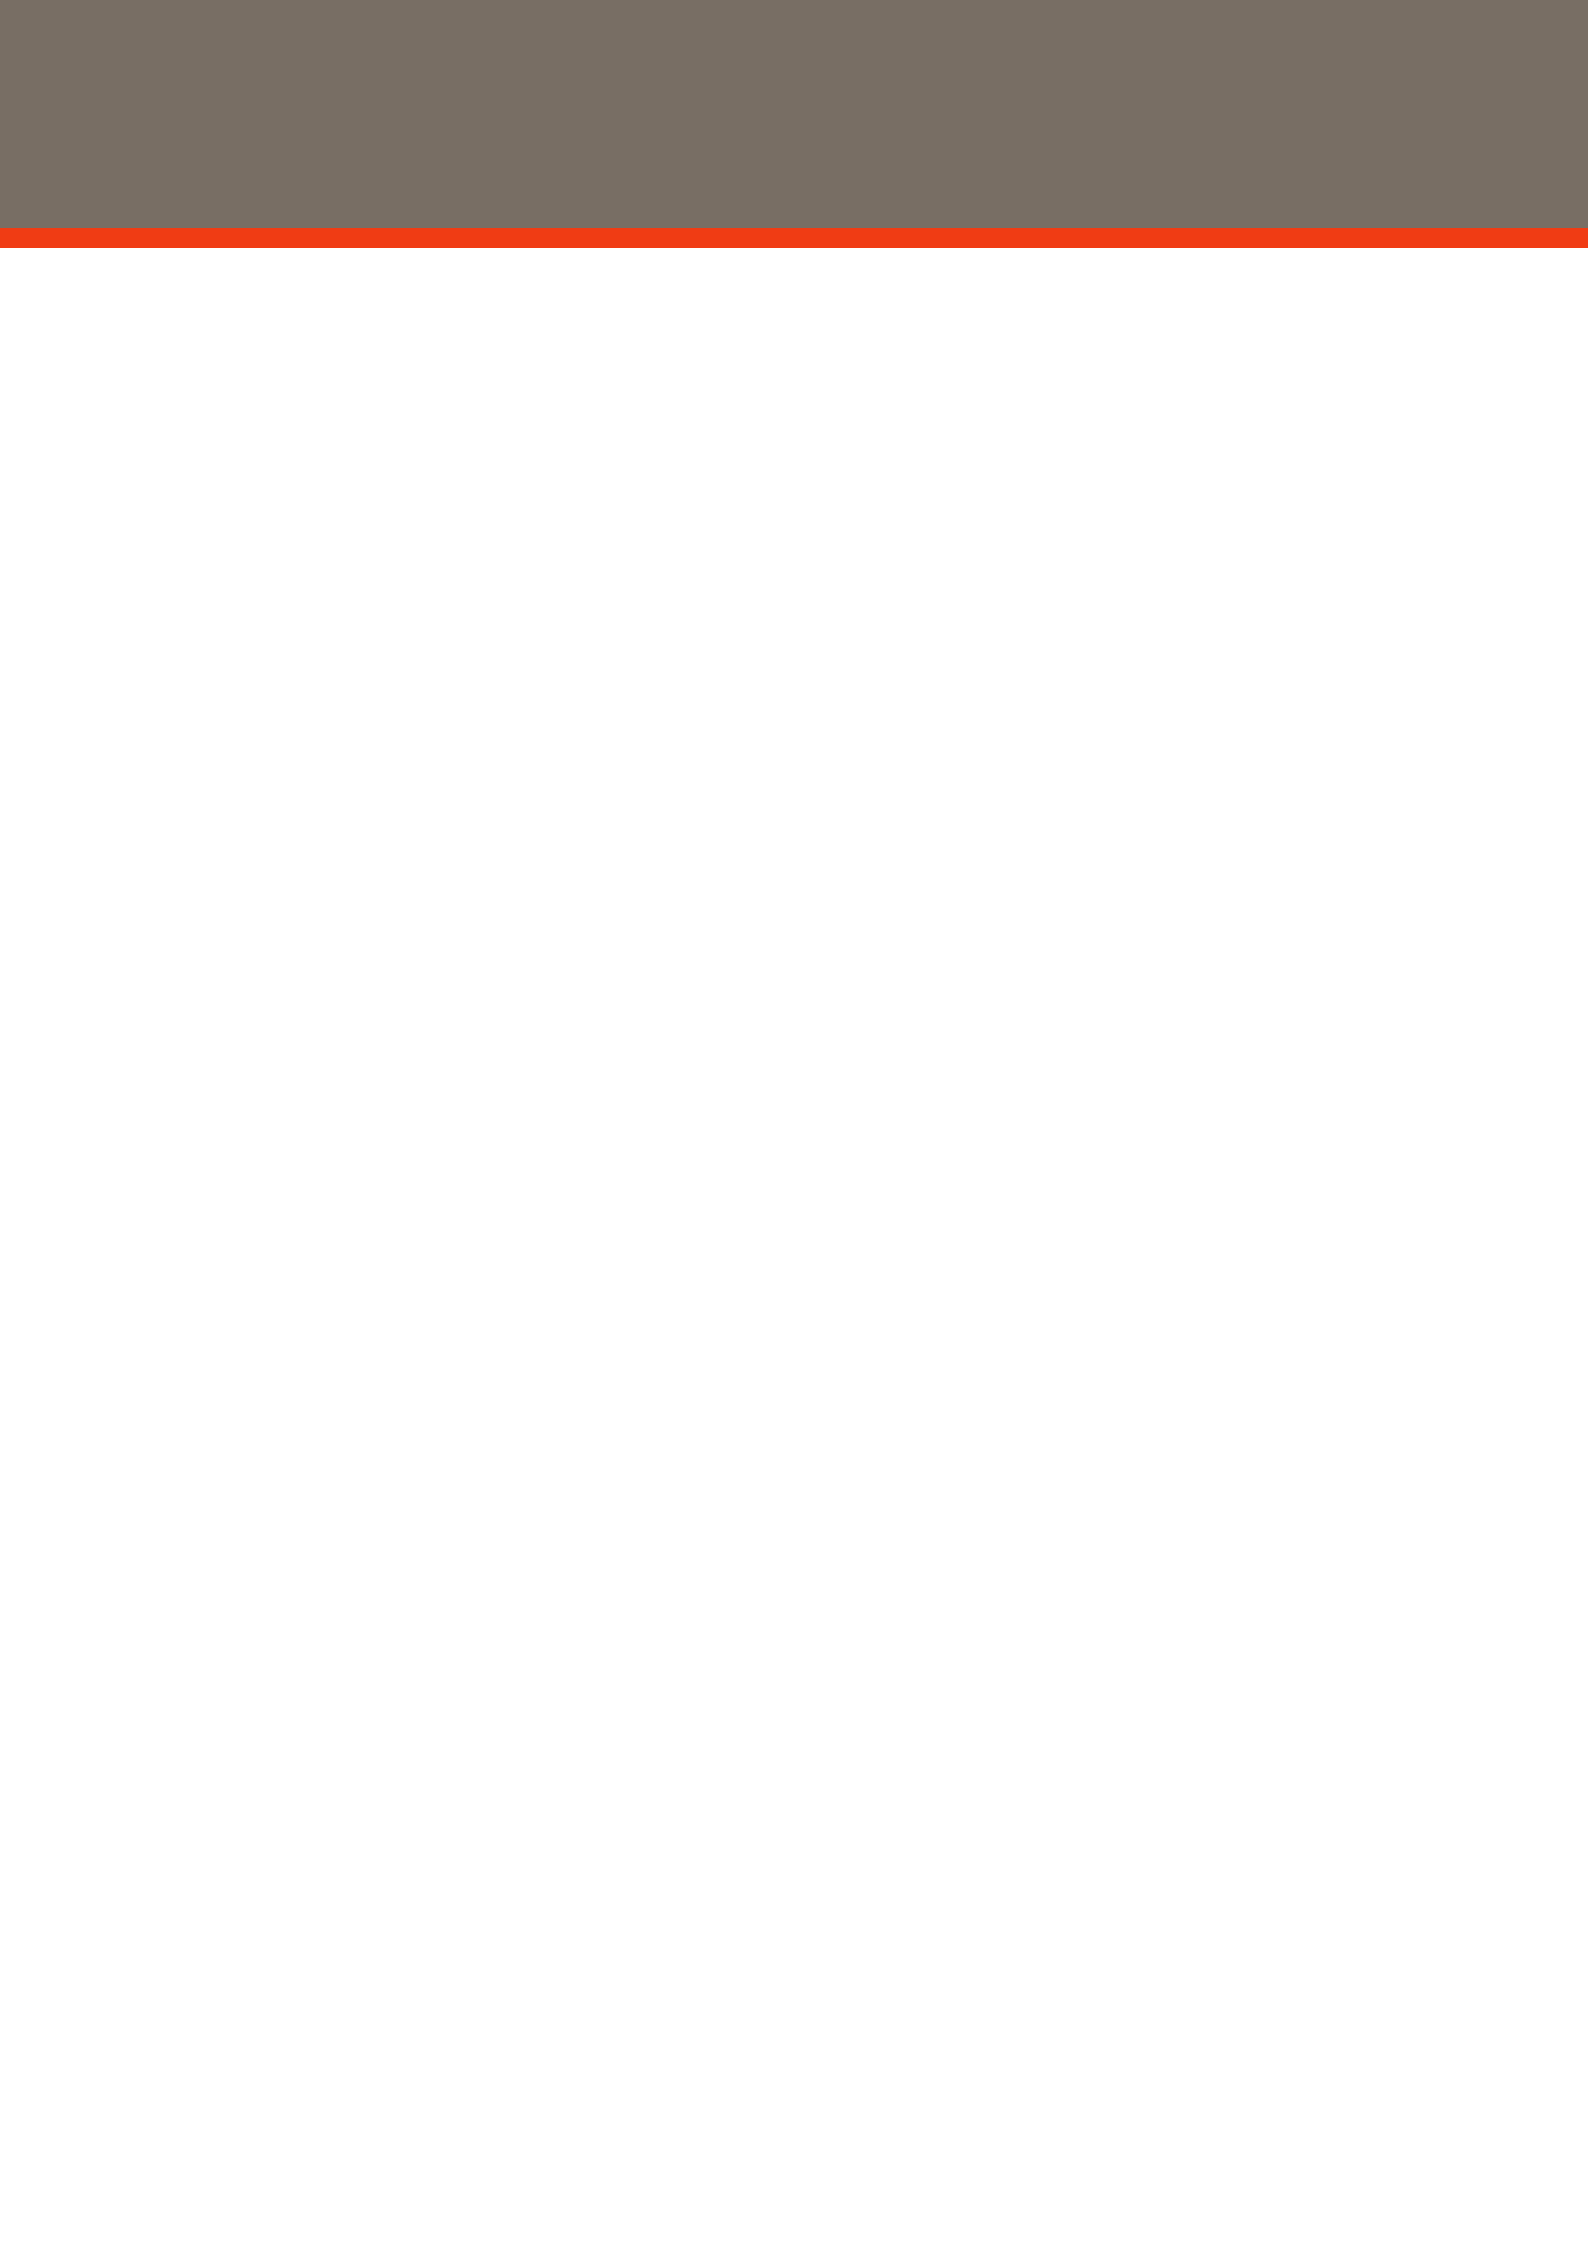

Supplement: MOESM1 [file 15323048]
